# Supplementary material
Source: PubMed Central journal article supplement (PMC5718092)

## Supplemental Figure S1

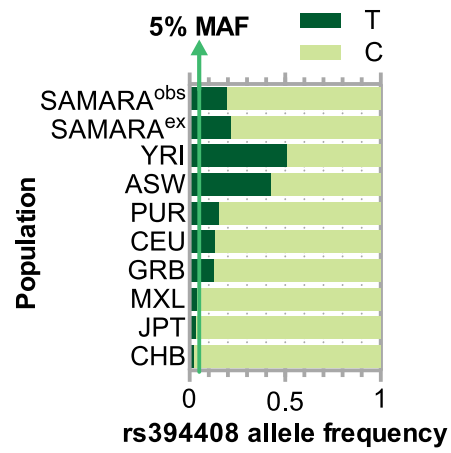

Supplement: mmc1.pdf [file mmc1.pdf]

## Supplemental Figure S2

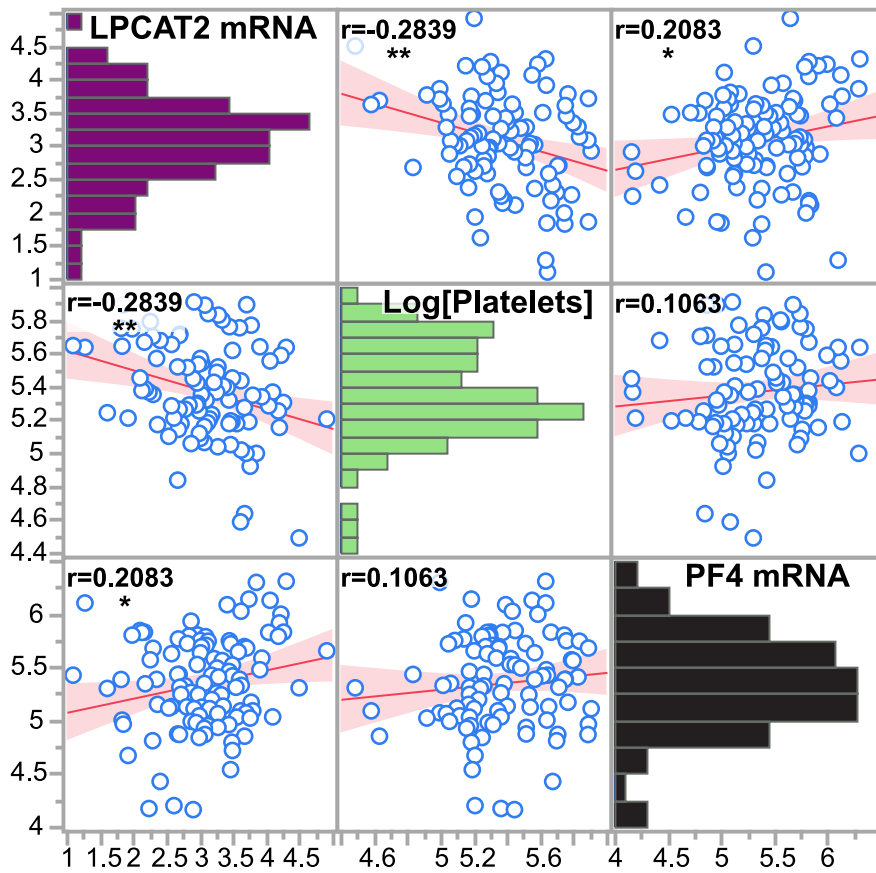

Supplement: mmc2.pdf [file mmc2.pdf]
